# Supplementary material for: Lead exposure induces dysregulation of constitutive heterochromatin hallmarks in live cells
Source: PubMed Central journal article supplement — Curr Res Toxicol. 2021 Dec 11;3:100061. doi: 10.1016/j.crtox.2021.12.001 (PMC8717252; doi:10.1016/j.crtox.2021.12.001), 2021-12-11
Supplement: mmc1.pdf [file mmc1.pdf]

## Supplementary materials

### Lead Exposure Induces Dysregulation of Constitutive Heterochromatin Hallmarks in Live Cells

Oscar F. Sánchez<sup>1</sup>, Li F. Lin<sup>1</sup>, Junkai Xie<sup>1</sup>, Jennifer L. Freeman<sup>2,3</sup>, Chongli Yuan<sup>1,3\*</sup>

1. Davidson School of Chemical Engineering, Purdue University, West Lafayette, IN 47907
2. School of Health Sciences, Purdue University, West Lafayette, IN, 47907, USA
3. Purdue Center of Cancer Research, Purdue University, West Lafayette, IN, 47907

\* To whom correspondence should be addressed. Tel: + 1 765 494 5824; Fax: + 1 765 494 0805;  
Email: [cyuan@purdue.edu](mailto:cyuan@purdue.edu)

## Table of Contents

### Supporting Tables

|                                                                                                                                                                                                                                                                                                                                                                                                                                                                                                     |     |
|-----------------------------------------------------------------------------------------------------------------------------------------------------------------------------------------------------------------------------------------------------------------------------------------------------------------------------------------------------------------------------------------------------------------------------------------------------------------------------------------------------|-----|
| <b>Table S1.</b> Amino acid sequence of <sup>me</sup> CpG, H3K9me3, H3K27me3 and H3K14ac protein sensors conjugated to either mEGFP N- or C- terminus, and negative control mEGFP N – and C–terminus lacking “reading” domain. SV40 NLS ( <i>italic</i> ), flexible linker ( <u>underscored</u> ), protein sensor ( <b>bold</b> ), and mEGFP N – or C–terminus ( <u>double underscored</u> ).                                                                                                       | S-4 |
| <b>Table S2.</b> qPCR primer list for DNA methylation and H3K9me3.                                                                                                                                                                                                                                                                                                                                                                                                                                  | S-6 |
| <b>Table S3.</b> <sup>me</sup> CpG and H3K9me3 data were adjusted for unimodal and bimodal distributions using Gauss and a mixture of Gauss models, respectively.                                                                                                                                                                                                                                                                                                                                   | S-7 |
| <b>Table S4.</b> The $\Delta\Delta C_t$ , defined as the $\Delta C_t$ treated with Pb compared to $\Delta C_t$ of untreated samples, with 95% confidence interval (CI) and expression fold change of selected genes in HEK293T cells after Pb exposure, 100 or 500 ppb, for 48 h. Statistical difference, <i>P</i> value ( <i>P</i> ), in the expression fold change against the control, HEK293T cells Pb untreated, was calculated using a one-way ANOVA followed by a Tukey’s HSD post-hoc test. | S-9 |

### Supporting Figures

|                                                                                                                                                                                                                                                                                                                                                                                                                                                                                                                                                                                                                                                                                                                                                                                                                              |      |
|------------------------------------------------------------------------------------------------------------------------------------------------------------------------------------------------------------------------------------------------------------------------------------------------------------------------------------------------------------------------------------------------------------------------------------------------------------------------------------------------------------------------------------------------------------------------------------------------------------------------------------------------------------------------------------------------------------------------------------------------------------------------------------------------------------------------------|------|
| <b>Figure S1. Schematic representation of BiFC strategy for recognizing one or two different epigenetic marks closely localized.</b> Probes fused to the split fluorescence protein ( <i>i.e.</i> , N-terminal or C-terminal of mEGFP) that are close to each other will produce a fluorescence signal distinctive from background and non-interacting molecules remain dark. Homodimeric constructs refer to the same epigenetic probe fused to split mEGFP for sensing one specific epigenetic mark. Heterodimeric constructs refer to two different epigenetic probes fused to split mEGFP for sensing two different epigenetic marks.                                                                                                                                                                                    | S-10 |
| <b>Figure S2. No particular features such as foci or fluorescent islands are observed in transfected cells with the BiFC negative control.</b> Transfected cells with BiFC-mEGFP shows diffusive fluorescence while transfected cells with either mEGFP-N or mEGFP-C exhibited auto-fluorescence at high laser power. Scale bar = 5 $\mu$ m.                                                                                                                                                                                                                                                                                                                                                                                                                                                                                 | S-11 |
| <b>Figure S3. Quantitative determination of H3K9me3 levels in HEK293T cells exposed to Pb via immunostaining.</b> <b>A.</b> Representative 2D projected images of HEK293T cells after 24 h exposure for 24 h to Pb, 100 or 500 ppb and immunostained with anti-H3K9me3 antibody. Scale bar = 2 $\mu$ m. <b>B.</b> Relative H3K9me3 levels to the control, or 0 ppb of Pb, using the integrated intensity per nuclei (IIN) obtained from image analysis. Data is presented as the mean $\pm$ S.D., N=3. <b>C.</b> Probability density distribution of the IIN obtained from single cell image analysis, n $\geq$ 150. Presented data corresponds to at least 50 cells per biological repeat, N = 3. ** represents <i>p</i> < 0.01 and *** represents <i>p</i> < 0.001 from a One-way ANOVA followed by Tukey’s post hoc test. | S-12 |
| <b>Figure S4. Change of H3K9me3 (A and B) and <sup>me</sup>CpG (C and D) levels in HEK293T cells exposed to Pb captured by homodimeric probes mCDY-BiFC and dMBD-BiFC, respectively.</b> For both homodimeric probes, the probability distribution from FACS histograms ( <b>A and C</b> ) reveals two subpopulations. The total population was divided in low fluorescence intensity (LFI) and high fluorescence intensity (HFI) subpopulations. Like the image analysis a drop in the relative H3K9me and <sup>me</sup> CpG level was                                                                                                                                                                                                                                                                                      |      |

obtained from the comparison of the median fluorescence intensity of the total cell population analyzed between Pb-treated groups and the untreated control group (**B and D**). \*,  $p < 0.05$ ,  $n \geq 3$ , one-way ANOVA followed by Tukey's HSD post-hoc test.

S-13

**Figure S5. Quantitative determination of <sup>me</sup>CpG levels in HEK293T cells exposed to Pb via immunostaining.** **A.** Representative 2D projected images of HEK293T cells after 24 h exposure for 24 h to Pb, 100 or 500 ppb and immunostained with anti-<sup>me</sup>CpG antibody. Scale bar = 2  $\mu$ m. **B.** Relative <sup>me</sup>CpG levels to the control, or 0 ppb of Pb, using the integrated intensity per nuclei (IIN) obtained from image analysis. Data is presented as the mean  $\pm$  S.D., N=3. **C.** Probability density distribution of the IIN obtained from single cell image analysis,  $n \geq 150$ . Presented data corresponds to at least 50 cells per biological repeat, N = 3. \*\* represents  $p < 0.01$  and \*\*\* represents  $p < 0.001$  from a One-way ANOVA followed by Tukey's post hoc test.

S-14

**Figure S6. Relative H3K9me3 (A) and meCpG (B) levels after 24 h of Pb cessation determined by immunostaining.** HEK293T cells were immunostained at the end of a Pb exposure of 24 h followed by a Pb cessation of 24 h. Relative H3K9me3 and meCpG levels were calculated against a control group, or 0 ppb of Pb, after 24 h of culture. Presented data corresponds to at least 1500 cells per biological repeat, N = 3. NS: stands for non-significant difference, \*\*\* represents  $p < 0.001$  from a One-way ANOVA followed by Tukey's post hoc test.

S-15

**Table S1.** Amino acid sequence of <sup>me</sup>CpG, H3K9me3, H3K27me3 and H3K14ac protein sensors conjugated to either N- or C-mEGFP terminus, and negative control N – and C–mEGFP terminus lacking “reading” domain. SV40 NLS (*italic*), flexible linker (underscored), protein sensor (**bold**), and mEGFP N – or C–terminus (double underscored).

| Name                            | Amino acid sequence          |                              |                              |                               |                              |
|---------------------------------|------------------------------|------------------------------|------------------------------|-------------------------------|------------------------------|
|                                 | 10                           | 20                           | 30                           | 40                            | 50                           |
| <b><sup>me</sup>CpG-N-mEGFP</b> | <u>MPKKKRKVGS</u>            | <u>GSGSGSGGSE</u>            | <b>FAEDWLDSPA</b>            | <b>LGPGWKRREV</b>             | <b>FRKSGATAGR</b>            |
|                                 | 60                           | 70                           | 80                           | 90                            | 100                          |
|                                 | <b>SDTYYSPTG</b>             | <b>DRIRSKVELT</b>            | <b>RYLGPA<del>DLT</del></b>  | <b>LFDFKQGILG</b>             | <u>GGQFAEDWLD</u>            |
|                                 | 110                          | 120                          | 130                          | 140                           | 150                          |
|                                 | <b>SPALGPGWKR</b>            | <b>REVFRKSGAT</b>            | <b>AGRS<del>DTYYQS</del></b> | <b>PTGDRIRSKV</b>             | <b>ELTRYLGPA<del>G</del></b> |
|                                 | 160                          | 170                          | 180                          | 190                           | 200                          |
|                                 | <b>DLTLFDFKQ<del>G</del></b> | <u>ILGGGQFVPV</u>            | <u>ATM<del>VSKG</del>EEL</u> | <u>FTGVVPILVE</u>             | <u>LDGDVNGHKE</u>            |
|                                 | 210                          | 220                          | 230                          | 240                           | 250                          |
|                                 | <u>SVSGEGEGDA</u>            | <u>TYGKLT<del>LKFI</del></u> | <u>CTTGKLPVPW</u>            | <u>PTLVTT<del>LT</del>YG</u>  | <u>VQCFSRYPDH</u>            |
|                                 | 260                          | 270                          | 280                          | 290                           | 300                          |
| <u>MKQHDFFKSA</u>               | <u>MPEGYVQERT</u>            | <u>IFFKDDGNYK</u>            | <u>TRAEVKFEGD</u>            | <u>TLVNRIELKG</u>             |                              |
| 310                             | 320                          | 330                          | 340                          |                               |                              |
| <u>IDFKEDGNIL</u>               | <u>GHKLEYN<del>YNS</del></u> | <u>HN<del>VY</del>IMADKQ</u> | <u>KNGIKVNF<del>KI</del></u> | <u>RHNIE</u>                  |                              |
| <b><sup>me</sup>CG-C-mEGFP</b>  | 10                           | 20                           | 30                           | 40                            | 50                           |
|                                 | <u>MPKKKRKVGS</u>            | <u>GSGSGSGGSE</u>            | <b>FAEDWLDSPA</b>            | <b>LGPGWKRREV</b>             | <b>FRKSGATAGR</b>            |
|                                 | 60                           | 70                           | 80                           | 90                            | 100                          |
|                                 | <b>SDTYYSPTG</b>             | <b>DRIRSKVELT</b>            | <b>RYLGPA<del>DLT</del></b>  | <b>LFDFKQGILG</b>             | <u>GGQFAEDWLD</u>            |
|                                 | 110                          | 120                          | 130                          | 140                           | 150                          |
|                                 | <b>SPALGPGWKR</b>            | <b>REVFRKSGAT</b>            | <b>AGRS<del>DTYYQS</del></b> | <b>PTGDRIRSKV</b>             | <b>ELTRYLGPA<del>G</del></b> |
|                                 | 160                          | 170                          | 180                          | 190                           | 200                          |
|                                 | <b>DLTLFDFKQ<del>G</del></b> | <u>ILGGGQFVPV</u>            | <u>AT<del>DKQ</del>KNGIK</u> | <u>VNF<del>KIR</del>HNIE</u>  | <u>DGSVQ<del>LADHY</del></u> |
|                                 | 210                          | 220                          | 230                          | 240                           | 250                          |
|                                 | <u>QQNTPIGDGP</u>            | <u>VLLPDNH<del>YLS</del></u> | <u>TQSKLSKDPN</u>            | <u>EKR<del>DH</del>MVLLLE</u> | <u>FVTAAGITLG</u>            |
|                                 |                              |                              |                              |                               |                              |
|                                 |                              |                              |                              | <u>MDELYK</u>                 |                              |
| <b>H3K9me3-N-mEGFP</b>          | 10                           | 20                           | 30                           | 40                            | 50                           |
|                                 | <u>MPKKKRKVGS</u>            | <u>GSGSGSGGSE</u>            | <b>FASQEF<del>EVEA</del></b> | <b>IVDKRQDKNG</b>             | <b>NTQYLVRWKG</b>            |
|                                 | 60                           | 70                           | 80                           | 90                            | 100                          |
|                                 | <b>YDKQDDT<del>WEP</del></b> | <b>EQHLMNCEKC</b>            | <b>VHDFNRRQTE</b>            | <b>KQK<del>KL</del>TWTTT</b>  | <b>SRIFSN<del>NAGS</del></b> |
|                                 | 110                          | 120                          | 130                          | 140                           | 150                          |
|                                 | <u>GGGGGSQ<del>LGS</del></u> | <u>GGVDSCLPVA</u>            | <u>TMVSKGEELE</u>            | <u>TGVVPILVEL</u>             | <u>DGDVNGHKFS</u>            |
|                                 | 160                          | 170                          | 180                          | 190                           | 200                          |
|                                 | <u>VSGEGEGDAT</u>            | <u>YGKLT<del>LKFI</del></u>  | <u>TTGKLPVPWP</u>            | <u>TLVTT<del>LT</del>YGV</u>  | <u>QCFSRYPDHM</u>            |
|                                 | 210                          | 220                          | 230                          | 240                           | 250                          |
|                                 | <u>KQHDFFKSAM</u>            | <u>PEGYVQERTI</u>            | <u>FFKDDGNYKT</u>            | <u>RAEVKFEGDT</u>             | <u>LVNRIELKGI</u>            |
| 260                             | 270                          | 280                          | 290                          |                               |                              |
| <u>DFKEDGNILG</u>               | <u>HKLEYN<del>YNSH</del></u> | <u>NVYIMADKQK</u>            | <u>NGIKVNF<del>KIR</del></u> | <u>HNIE</u>                   |                              |
| <b>H3K9me3-C-mEGFP</b>          | 10                           | 20                           | 30                           | 40                            | 50                           |
|                                 | <u>MPKKKRKVGS</u>            | <u>GSGSGSGGSE</u>            | <b>FASQEF<del>EVEA</del></b> | <b>IVDKRQDKNG</b>             | <b>NTQYLVRWKG</b>            |
|                                 | 60                           | 70                           | 80                           | 90                            | 100                          |
|                                 | <b>YDKQDDT<del>WEP</del></b> | <b>EQHLMNCEKC</b>            | <b>VHDFNRRQTE</b>            | <b>KQK<del>KL</del>TWTTT</b>  | <b>SRIFSN<del>NAGS</del></b> |
| 110                             | 120                          | 130                          | 140                          | 150                           |                              |

|                                   |                   |                   |                   |                   |                   |
|-----------------------------------|-------------------|-------------------|-------------------|-------------------|-------------------|
|                                   | <u>GGGGGSQLGS</u> | <u>GGVDSCLPVA</u> | <u>TDKQKNGIKV</u> | <u>NFKIRHNIED</u> | <u>GSVQLADHYQ</u> |
|                                   | 160               | 170               | 180               | 190               | 200               |
|                                   | <u>ONTPIGDGPV</u> | <u>LLPDNHYLST</u> | <u>QSKLSKDPNE</u> | <u>KRDHMLLEF</u>  | <u>VTAAGITLGM</u> |
|                                   | <u>DELYK</u>      |                   |                   |                   |                   |
|                                   | 10                | 20                | 30                | 40                | 50                |
| <b>mEGFP N-terminus (Control)</b> | <u>MPKKKRKVGS</u> | <u>GSGSGSGGSE</u> | <u>LGSGGVDSC</u>  | <u>PVATMVSKGE</u> | <u>ELFTGVVPIL</u> |
|                                   | 60                | 70                | 80                | 90                | 100               |
|                                   | <u>VELDGDVNGH</u> | <u>KFSVSGELEG</u> | <u>DATYGKLTLL</u> | <u>FICTTGKLPV</u> | <u>PWPTLVTTLT</u> |
|                                   | 110               | 120               | 130               | 140               | 150               |
|                                   | <u>YGVQCFSRYP</u> | <u>DHMKQHDFFK</u> | <u>SAMPEGYVOE</u> | <u>RTIFFKDDGN</u> | <u>YKTRAEVKFE</u> |
|                                   | 160               | 170               | 180               | 190               | 200               |
|                                   | <u>GDTLVNRIEL</u> | <u>KGIDFKEDGN</u> | <u>ILGHKLEINY</u> | <u>NSHNVYIMAD</u> | <u>KQKNGIKVNF</u> |
|                                   | <u>KIRHNIE</u>    |                   |                   |                   |                   |
|                                   | 10                | 20                | 30                | 40                | 50                |
| <b>mEGFP C-terminus (Control)</b> | <u>MPKKKRKVGS</u> | <u>GSGSGSGGSE</u> | <u>LSVGVDSCLP</u> | <u>VATDKQKNGI</u> | <u>KVNFKIRHNI</u> |
|                                   | 60                | 70                | 80                | 90                | 100               |
|                                   | <u>EDGSVQLADH</u> | <u>YQONTPIGDG</u> | <u>PVLLPDNHYL</u> | <u>STQSKLSKDP</u> | <u>NEKRDHMLLL</u> |
|                                   | 110               |                   |                   |                   |                   |
|                                   | <u>EFVTAAGITL</u> | <u>GMDELYK</u>    |                   |                   |                   |

**Table S2.** A list of qPCR primers used to quantify mRNA level of “writer” and “eraser” proteins for DNA methylation and H3K9me3.

| <b>Gene Name</b> | <b>Primer Sequence 5' – 3'</b>                                       | <b>Reference</b>          |
|------------------|----------------------------------------------------------------------|---------------------------|
| <i>DNMT1</i>     | Forward: GGTTTTCTTCCTCAGCTACTGCGA<br>Reverse: CACTGATAGCCCATGCGGACCA | (Liao et al., 2015)       |
| <i>TET1</i>      | Forward: CAGAACCTAAACCACCCGTG<br>Reverse: TGCTTCGTAGCGCCATTGTAA      | (Yang et al., 2015)       |
| <i>KMT1A</i>     | Forward: GCACAAGTTTGCCTACAA<br>Reverse: CCAGGTCAAAGAGGTAGGTG         | (Lee et al., 2011)        |
| <i>KDM4A</i>     | Forward: GAAGCCA CGAGCATCCTATGA<br>Reverse: GCGGA ACTCTCGAACAGTCA    | (Wang et al., 2017)       |
| <i>β-ACTIN</i>   | Forward: GGAGTCCTGTGGCATCCACG<br>Reverse: CTAGAAGCATTTGCGGTGGA       | (Missiaglia et al., 2010) |

**Table S3.** <sup>me</sup>CpG and H3K9me3 data were adjusted for unimodal and bimodal distributions using Gauss and a mixture of Gauss models, respectively.

$$\text{Gauss model: } y = y_o + \left( \frac{A}{w\sqrt{\frac{\pi}{2}}} \right) e^{-2\left(\frac{x-x_c}{w}\right)^2}$$

**A. H3K9me3**

| [Pb] ppb | Parameters     | Peak 1         | Peak 2         |
|----------|----------------|----------------|----------------|
| 0        | y <sub>o</sub> | -0.0161±0.099  | -0.0161±0.099  |
|          | x <sub>c</sub> | 21.321±2.511   | 43.762±9.150   |
|          | w              | 12.243±1.109   | 46.537±5.767   |
|          | A              | 1.222±0.092    | 5.018±1.222    |
|          | R <sup>2</sup> | 0.86           |                |
| 100      | y <sub>o</sub> | -0.0022±0.0026 | -0.0022±0.0026 |
|          | x <sub>c</sub> | 23.198±0.617   | 45.729±0.360   |
|          | w              | 20.695±1.423   | 10.663±0.705   |
|          | A              | 2.619±0.183    | 1.528±0.125    |
|          | R <sup>2</sup> | 0.98           |                |
| 500      | y <sub>o</sub> | 0.0018±0.0056  | 0.0018±0.0056  |
|          | x <sub>c</sub> | 20.062±1.740   | 40.243±1.750   |
|          | w              | 17.052±3.081   | 13.562±2.820   |
|          | A              | 2.534±0.498    | 1.677±0.470    |
|          | R <sup>2</sup> | 0.94           |                |

**B. <sup>me</sup>CpG**

| [Pb] ppb | Parameters     | Peak 1         | Peak 2         |
|----------|----------------|----------------|----------------|
| 0        | y <sub>o</sub> | 0.0093±0.0073  | 0.0093±0.0073  |
|          | x <sub>c</sub> | 60.188±7.008   | 110.670±8.916  |
|          | w              | 35.443±9.63    | 43.365±15.678  |
|          | A              | 3.070±1.378    | 4.340±1.758    |
|          | R <sup>2</sup> | 0.89           |                |
| 100      | y <sub>o</sub> | 0.0270±0.0042  | 0.0270±0.0042  |
|          | x <sub>c</sub> | 43.201±1.111   | 74.558±1.271   |
|          | w              | 13.433±1.962   | 15.914±2.846   |
|          | A              | 1.996±0.300    | 2.133±0.346    |
|          | R <sup>2</sup> | 0.90           |                |
| 500      | y <sub>o</sub> | -0.0019±1.8E-4 | -0.0019±1.8E-4 |
|          | x <sub>c</sub> | 59.941±0.032   | 113.927±0.084  |
|          | w              | 33.209±0.076   | 28.556±0.187   |
|          | A              | 8.023±0.018    | 2.538±0.017    |
|          | R <sup>2</sup> | 0.97           |                |

C. <sup>me</sup>CpG-N-H3K9me3-C

| [Pb] ppb | Parameters     | Peak 1          | Peak 2          |
|----------|----------------|-----------------|-----------------|
| 0        | y <sub>o</sub> | -0.0103±0.0134  | -0.0103±0.0134  |
|          | x <sub>c</sub> | 10.620±0.479    | 31.113±2.269    |
|          | w              | 9.871±0.952     | 25.109±7.944    |
|          | A              | 1.579±0.244     | 1.865±0.906     |
|          | R <sup>2</sup> |                 | 0.94            |
| 100      | y <sub>o</sub> | -6.03E-4±0.0055 | -6.03E-4±0.0055 |
|          | x <sub>c</sub> | 6.438±0.508     | 17.993±2.005    |
|          | w              | 5.344±1.912     | 19.874±3.763    |
|          | A              | 0.514±0.304     | 2.614±0.584     |
|          | R <sup>2</sup> |                 | 0.95            |
| 500      | y <sub>o</sub> | -0.0032±0.0040  |                 |
|          | x <sub>c</sub> | 11.757±0.544    | N.A.            |
|          | w              | 19.877±1.403    |                 |
|          | A              | 3.616±0.273     |                 |
|          | R <sup>2</sup> |                 | 0.96            |

D. H3K9me3-N-<sup>me</sup>CpG-C

| [Pb] ppb | Parameters     | Peak 1         | Peak 2         |
|----------|----------------|----------------|----------------|
| 0        | y <sub>o</sub> | -0.0145±0.0213 | -0.0145±0.0213 |
|          | x <sub>c</sub> | 12.029±0.750   | 31.196±3.733   |
|          | w              | 9.533±1.598    | 24.161±11.454  |
|          | A              | 1.598±0.488    | 2.189±1.496    |
|          | R <sup>2</sup> |                | 0.90           |
| 100      | y <sub>o</sub> | -0.0027±0.0060 | -0.0027±0.0060 |
|          | x <sub>c</sub> | 9.414±0.479    | 22.316±4.931   |
|          | w              | 9.216±2.044    | 20.884±7.395   |
|          | A              | 1.265±0.704    | 1.955±0.976    |
|          | R <sup>2</sup> |                | 0.97           |
| 500      | y <sub>o</sub> | 0.0014±0.0055  |                |
|          | x <sub>c</sub> | 9.869±1.237    | N.A.           |
|          | w              | 24.100±3.000   |                |
|          | A              | 3.667±0.502    |                |
|          | R <sup>2</sup> |                | 0.94           |



**Table S4.** The  $\Delta\Delta C_t$ , defined as the  $\Delta C_t$  treated with Pb compared to  $\Delta C_t$  of untreated samples, with 95% confidence interval (CI) and expression fold change of selected genes in HEK293T cells after Pb exposure, 100 or 500 ppb, for 48 h. Statistical difference, *P* value (*P*), in the expression fold change against the control, HEK293T cells Pb untreated, was calculated using a one-way ANOVA followed by a Tukey's HSD post-hoc test.

| Epigenetic Function | Target Gene | [ATZ] ppb | $\Delta\Delta C_t \pm SE$ | 95% CI        | Fold Change     | <i>P</i>     |
|---------------------|-------------|-----------|---------------------------|---------------|-----------------|--------------|
| 5-mC writer         | DNMT1       | 100       | $-0.16 \pm 0.09$          | -0.26 – -0.06 | $1.12 \pm 0.06$ | 0.636        |
|                     |             | 500       | $-0.15 \pm 0.14$          | -0.31 – 0.01  | $1.12 \pm 0.11$ | 0.642        |
| 5-mC eraser         | TET1        | 100       | $-0.42 \pm 0.06$          | -0.49 – -0.35 | $1.34 \pm 0.05$ | <b>0.034</b> |
|                     |             | 500       | $-0.64 \pm 0.11$          | -0.76 – -0.51 | $1.57 \pm 0.11$ | <b>0.003</b> |
| H3K9me3 writer      | KMT1A       | 100       | $-1.04 \pm 0.09$          | -1.14 – -0.94 | $2.07 \pm 0.14$ | <b>0.005</b> |
|                     |             | 500       | $-0.90 \pm 0.13$          | -1.05 – -0.75 | $1.88 \pm 0.17$ | <b>0.013</b> |
| H3K9me3 eraser      | KDM4A       | 100       | $-0.28 \pm 0.18$          | -0.48 – -0.08 | $1.23 \pm 0.14$ | 0.558        |
|                     |             | 500       | $-0.25 \pm 0.23$          | -0.51 – 0.01  | $1.22 \pm 0.21$ | 0.584        |

A.

(a) BiFC protein sensors

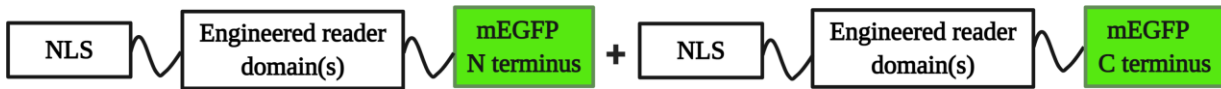

(b) BiFC negative control

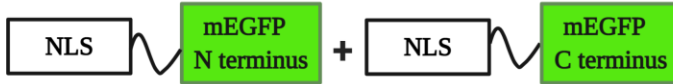

B.

Homodimer detection scheme

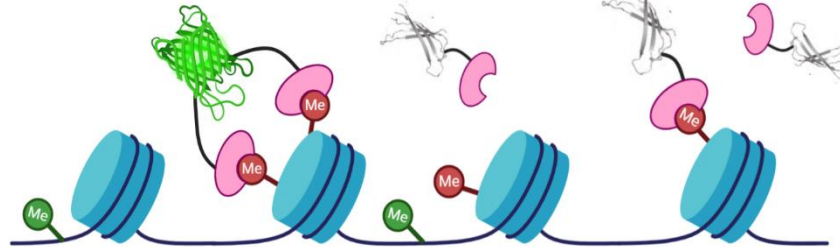

Heterodimer detection scheme

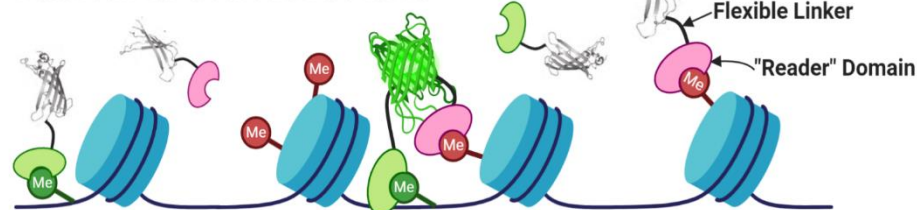

**Figure S1. A. Schematic representation of designed protein sensor. B. Schematic representation of BiFC strategy for recognizing one or two different epigenetic marks closely localized.** Probes fused to the split fluorescence protein (*i.e.*, N-terminal or C-terminal of mEGFP) that are close to each other will produce a fluorescence signal distinctive from background and non-interacting molecules remain dark. Homodimeric constructs refer to the same epigenetic probe fused to split mEGFP for sensing one specific epigenetic mark. Heterodimeric constructs refer to two different epigenetic probes fused to split mEGFP for sensing two different epigenetic marks.

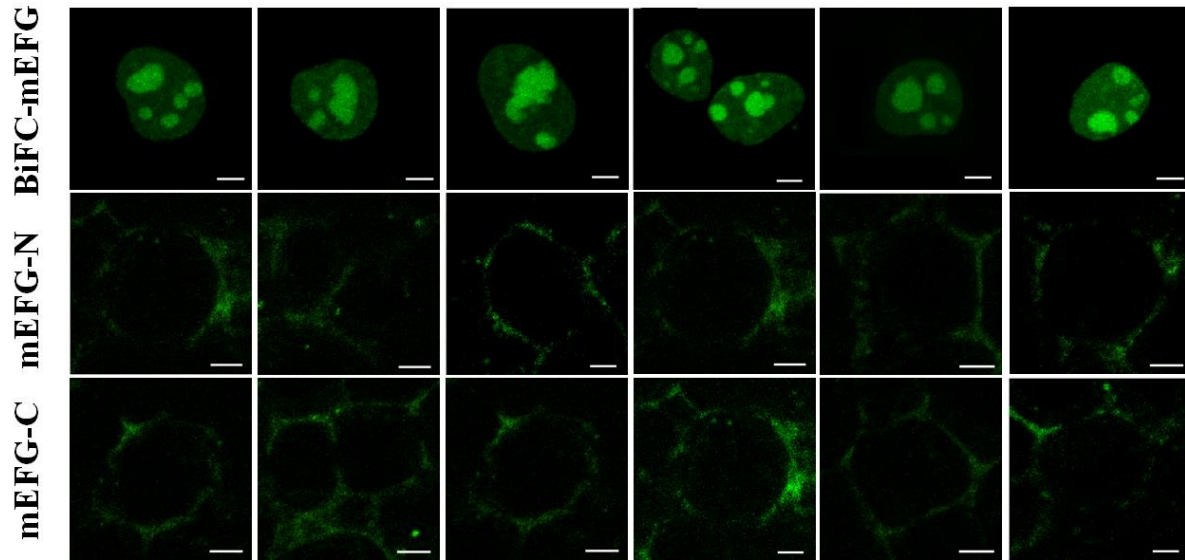

**Figure S2. No particular features such as foci or fluorescent islands are observed in transfected cells with the BiFC negative control.** Transfected cells with BiFC-mEGFP shows diffusive fluorescence while transfected cells with either mEGFP-N or mEGFP-C exhibited auto-fluorescence at high laser power. Scale bar = 5  $\mu$ m.

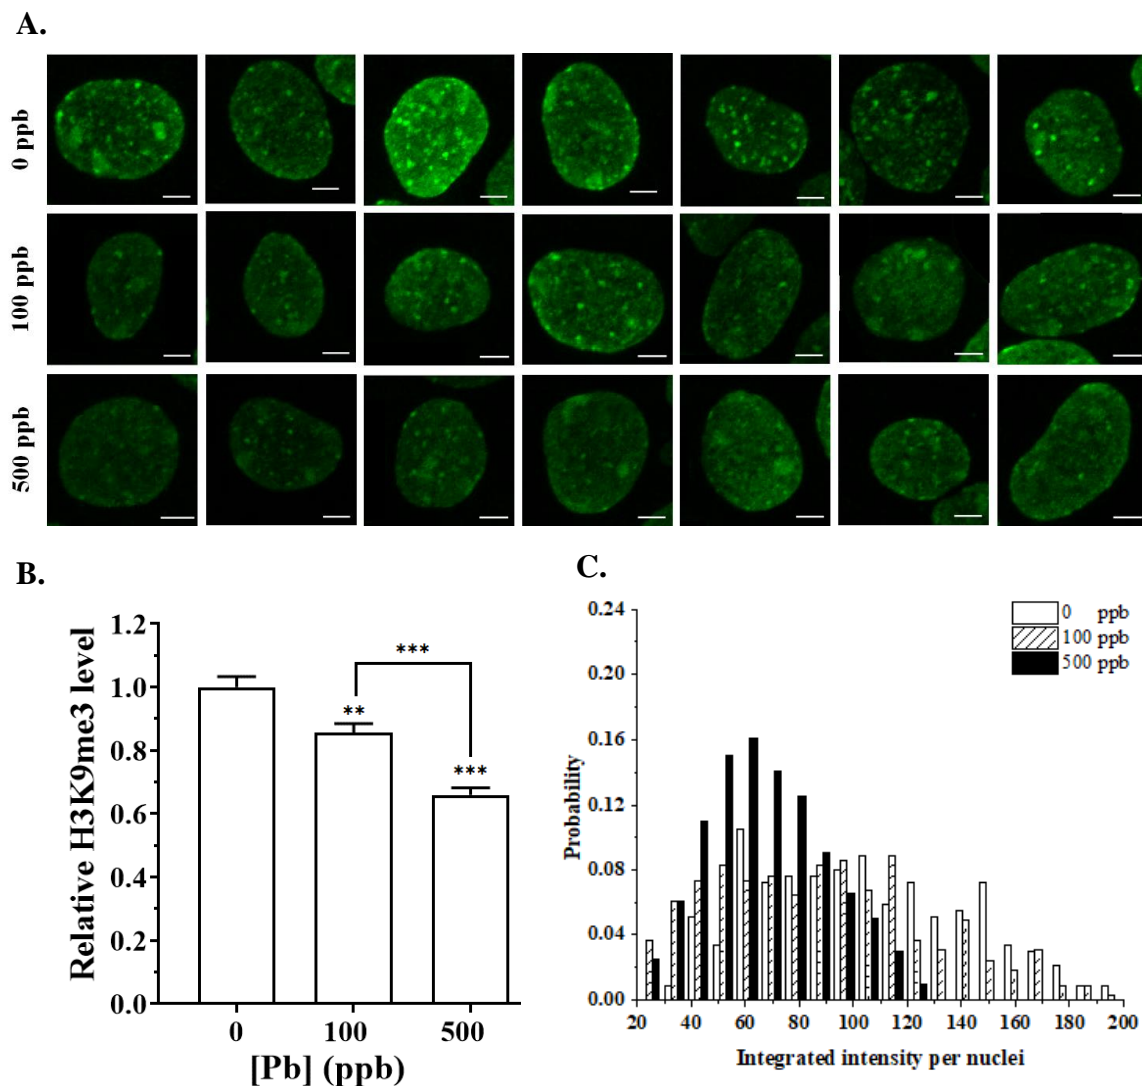

**Figure S3. Quantitative determination of H3K9me3 levels in HEK293T cells exposed to Pb via immunostaining.** **A.** Representative 2D projected images of HEK293T cells after 24 h exposure to Pb of 0, 100 or 500 ppb and immunostained with anti-H3K9me3 antibody. Scale bar = 2  $\mu$ m. **B.** Relative H3K9me3 levels to the control, or 0 ppb of Pb, using the integrated intensity per nuclei (IIN) obtained from image analysis. Data = mean  $\pm$  S.E., N=3. **C.** Probability density distribution of the IIN obtained from single cell image analysis,  $n \geq 150$ . The data presented corresponds to at least 50 cells per biological repeat, N = 3. \*\*:  $p < 0.01$  and \*\*\*:  $p < 0.001$  from a One-way ANOVA followed by Tukey's post-hoc test.

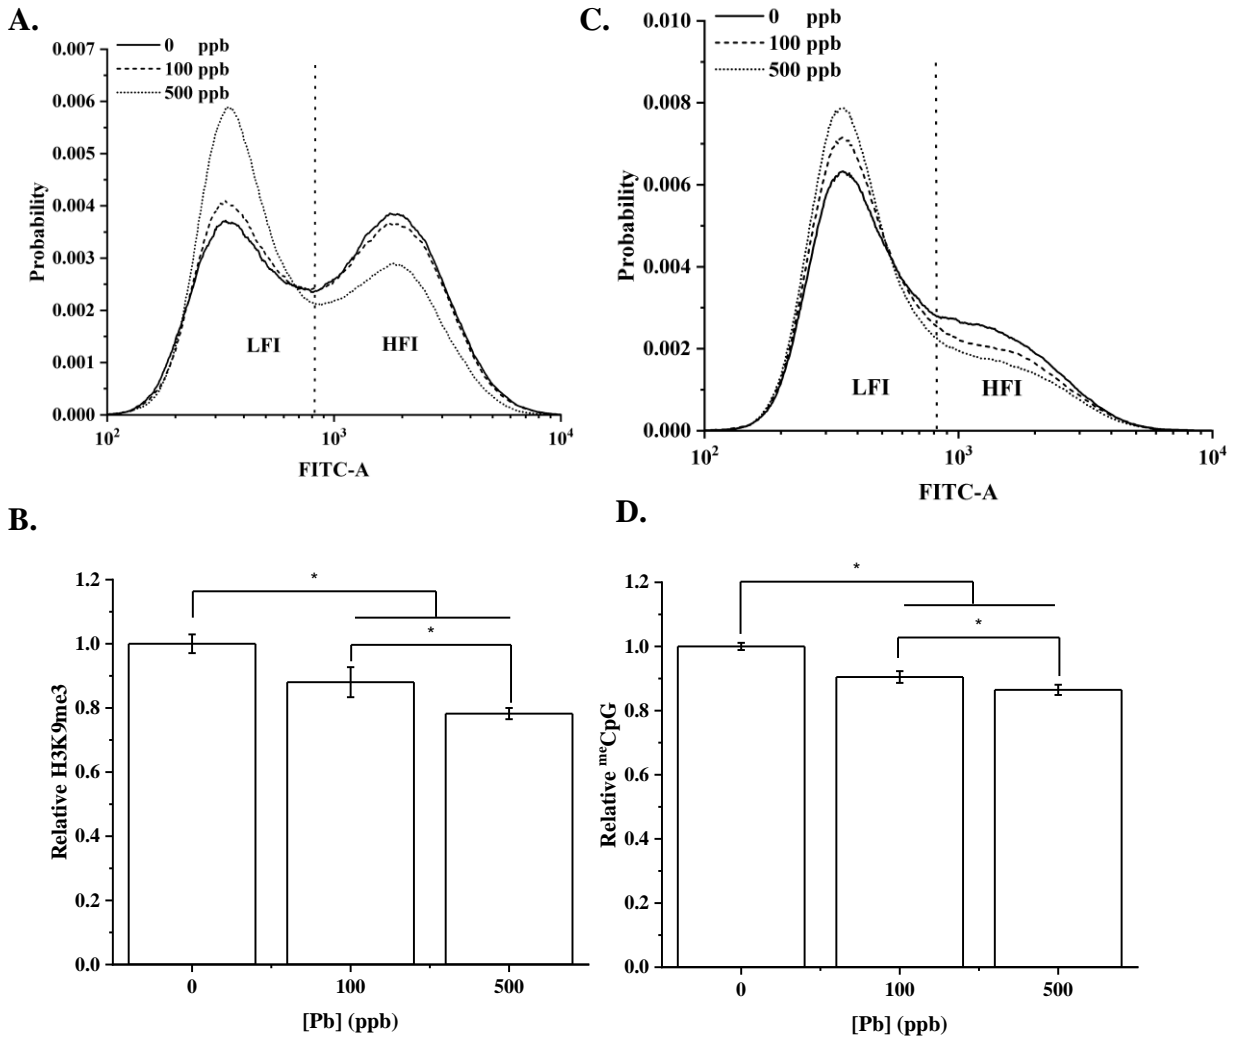

**Figure S4. Change of H3K9me3 (A and B) and  $^{me}CpG$  (C and D) levels in HEK293T cells exposed to Pb captured by homodimeric H3K9me3 and  $^{me}CpG$  BiFC probes, respectively.** For both homodimeric probes, the probability distribution from FACS histograms (**A and C**) reveals two subpopulations. The cell population consist of a low fluorescence intensity (LFI) and high fluorescence intensity (HFI) sub-population. Like the image analysis a drop in the relative H3K9me and  $^{me}CpG$  level was obtained from the comparison of the median fluorescence intensity of the total cell population analyzed between Pb-treated groups and the untreated control group (**B and D**). \*,  $p < 0.05$ ,  $n \geq 3$ , one-way ANOVA followed by Tukey's HSD post-hoc test.

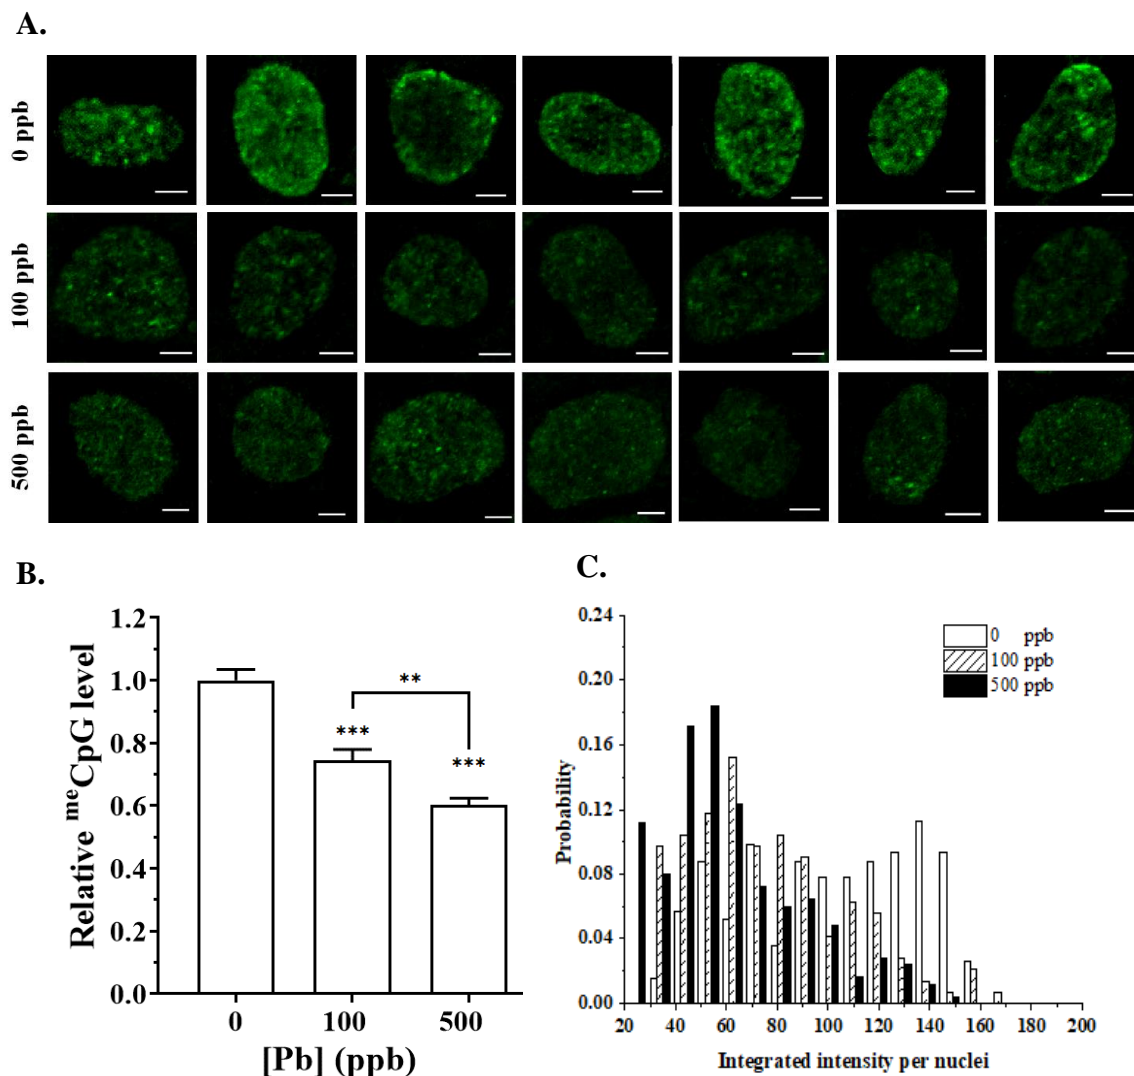

**Figure S5. Quantitative determination of <sup>me</sup>CpG levels in HEK293T cells exposed to Pb via immunostaining.** **A.** Representative 2D projected images of HEK293T cells after 24 h exposure to Pb, 100 or 500 ppb and immunostained with anti-<sup>me</sup>CpG antibody. Scale bar = 2  $\mu$ m. **B.** Relative <sup>me</sup>CpG levels to the control, or 0 ppb of Pb, using the integrated intensity per nuclei (IIN) obtained from image analysis. Data is presented as the mean  $\pm$  SEM, N=3. **C.** Probability density distribution of the IIN obtained from single cell image analysis, n  $\geq$  150. The data presented corresponds to at least 50 cells per biological repeat, N = 3. \*\*:  $p < 0.01$  and \*\*\*:  $p < 0.001$  from a one-way ANOVA followed by Tukey's post-hoc test.

**A.**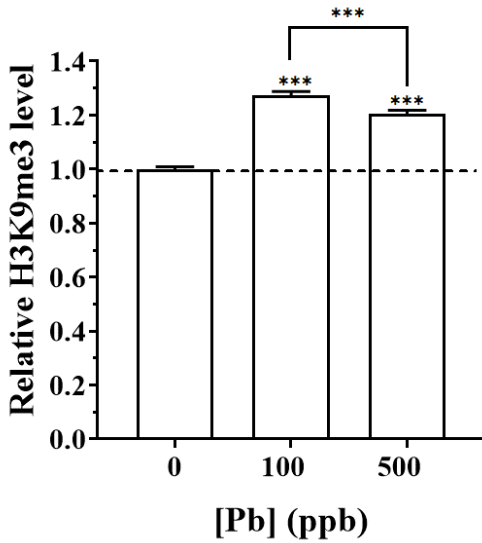**B.**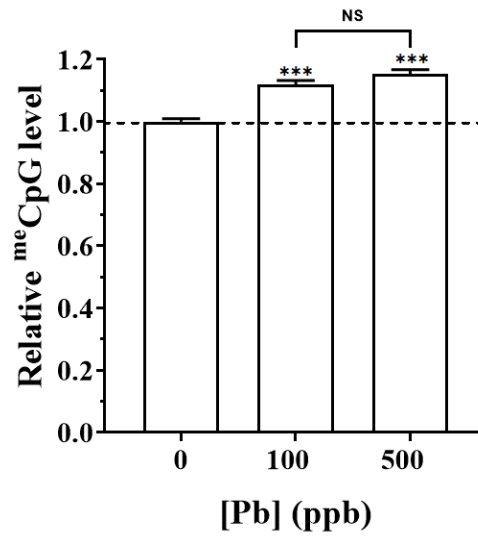

**Figure S6. Relative H3K9me3 (A) and <sup>me</sup>CpG (B) levels after 24 h of Pb cessation determined by immunostaining.** HEK293T cells were immunostained at the end of a Pb exposure of 24 h followed by a Pb cessation of 24 h. Relative H3K9me3 and <sup>me</sup>CpG levels were calculated against a control group, or 0 ppb of Pb, after 24 h of culture. Presented data corresponds to at least 1500 cells per biological repeat, N = 3. NS: stands for non-significant difference, \*\*\* represents  $p < 0.001$  from a one-way ANOVA followed by Tukey's post hoc test.
